# Supplementary figures and images for: Identification of Anti-TNFα VNAR Single Domain Antibodies from Whitespotted Bambooshark (Chiloscyllium plagiosum)
Source: MDPI journal article supplement (doi:10.3390/md20050307), 2022-04-29

**Supplementary Materials:**

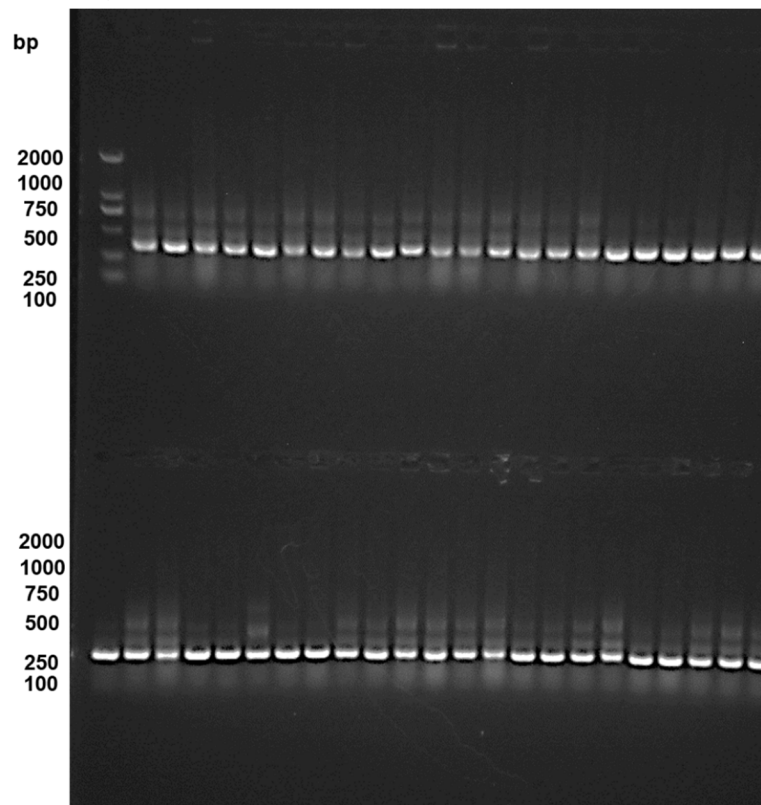

Figure S1: The PCR verified the library quality.

Supplement: s1 [file s1]
